# Supplementary material for: Identification of Aging‐Related Genes Associated with Prognostic Value and Immune Microenvironment Characteristics in Diffuse Large B‐Cell Lymphoma
Source: Hindawi journal article supplement (doi:10.1155/2022/3334522), 2022-01-01
Supplement: f2 [file 3334522.f2.pdf]

|          | pvalue | Hazard ratio       |
|----------|--------|--------------------|
| GHRH     | 0.003  | 1.168(1.052–1.296) |
| TP53     | <0.001 | 1.272(1.105–1.464) |
| TERT     | <0.001 | 1.270(1.110–1.454) |
| PLAU     | 0.007  | 0.831(0.728–0.950) |
| ERCC2    | <0.001 | 1.402(1.148–1.711) |
| E2F1     | <0.001 | 1.400(1.174–1.668) |
| STAT3    | 0.039  | 1.306(1.014–1.684) |
| STAT5A   | 0.044  | 1.218(1.005–1.475) |
| HDAC3    | 0.001  | 1.705(1.228–2.367) |
| IL7R     | <0.001 | 0.724(0.647–0.811) |
| IGF1     | 0.012  | 0.815(0.694–0.957) |
| IRS1     | 0.004  | 0.810(0.703–0.934) |
| AKT1     | 0.011  | 1.228(1.049–1.438) |
| PIK3CB   | 0.023  | 0.783(0.634–0.967) |
| HRAS     | 0.002  | 1.452(1.147–1.838) |
| MYC      | <0.001 | 1.520(1.280–1.805) |
| NBN      | 0.002  | 0.623(0.462–0.840) |
| JUND     | <0.001 | 1.273(1.113–1.457) |
| PPARA    | 0.028  | 1.496(1.045–2.142) |
| RET      | 0.006  | 1.285(1.076–1.535) |
| TCF3     | 0.003  | 1.497(1.152–1.945) |
| BRCA1    | 0.002  | 1.390(1.128–1.713) |
| PTEN     | 0.005  | 0.629(0.455–0.870) |
| HIF1A    | <0.001 | 0.405(0.300–0.546) |
| UBB      | 0.019  | 0.698(0.516–0.944) |
| BCL2     | 0.005  | 1.291(1.081–1.542) |
| S100B    | <0.001 | 0.838(0.756–0.928) |
| VCP      | 0.001  | 1.744(1.248–2.436) |
| POLG     | <0.001 | 1.522(1.186–1.952) |
| IGFBP3   | <0.001 | 0.749(0.665–0.845) |
| HSP90AA1 | 0.005  | 0.730(0.587–0.909) |
| NR3C1    | <0.001 | 0.254(0.181–0.356) |
| EGR1     | 0.009  | 0.803(0.681–0.946) |
| ABL1     | <0.001 | 1.468(1.199–1.798) |
| TOP1     | <0.001 | 0.814(0.728–0.910) |
| RAD51    | 0.026  | 1.238(1.026–1.493) |
| UBE2I    | 0.005  | 1.424(1.114–1.820) |
| CEBPA    | <0.001 | 0.770(0.664–0.892) |
| TGFB1    | 0.004  | 1.353(1.102–1.661) |
| STK11    | 0.012  | 1.282(1.056–1.557) |
| HTT      | 0.030  | 1.288(1.025–1.618) |
| PRKCA    | 0.013  | 0.752(0.600–0.941) |
| ERCC3    | 0.017  | 1.397(1.062–1.839) |
| TERF1    | 0.006  | 0.690(0.532–0.897) |
| ERCC5    | 0.014  | 0.640(0.448–0.914) |
| FAS      | 0.037  | 0.844(0.720–0.990) |
| XRCC6    | 0.017  | 1.394(1.061–1.833) |
| POLD1    | 0.002  | 1.412(1.137–1.753) |
| BAX      | 0.019  | 1.285(1.043–1.583) |
| EMD      | 0.008  | 1.335(1.077–1.655) |
| FOXO1    | 0.041  | 0.791(0.632–0.990) |
| HSF1     | 0.006  | 1.270(1.073–1.504) |
| RECQL4   | <0.001 | 1.318(1.132–1.536) |
| SOD1     | 0.030  | 0.716(0.530–0.968) |
| FOXM1    | 0.017  | 1.216(1.036–1.427) |
| LRP2     | 0.041  | 0.849(0.725–0.994) |
| AIFM1    | 0.004  | 1.353(1.099–1.667) |
| RELA     | 0.015  | 1.304(1.054–1.613) |
| TOP3B    | 0.031  | 1.134(1.012–1.271) |
| HDAC1    | <0.001 | 0.652(0.508–0.837) |
| HSPA9    | 0.004  | 1.669(1.175–2.370) |
| GSS      | <0.001 | 1.877(1.383–2.547) |
| GSTA4    | 0.017  | 0.843(0.733–0.970) |
| GSTP1    | 0.015  | 0.789(0.653–0.955) |
| PCMT1    | 0.006  | 0.621(0.443–0.870) |
| YWHAZ    | 0.024  | 0.576(0.357–0.929) |
| PTK2B    | 0.036  | 1.115(1.007–1.234) |
| PTK2     | <0.001 | 0.652(0.540–0.787) |
| IL7      | 0.004  | 0.859(0.775–0.952) |
| HMGB1    | 0.004  | 0.597(0.421–0.846) |
| SDHC     | 0.007  | 1.711(1.155–2.533) |
| HESX1    | 0.042  | 1.122(1.004–1.253) |
| PIK3R1   | <0.001 | 0.666(0.562–0.788) |
| AGPAT2   | 0.026  | 1.304(1.032–1.648) |
| CREB1    | <0.001 | 0.553(0.422–0.726) |
| TBP      | 0.009  | 1.695(1.141–2.519) |
| HBP1     | 0.026  | 0.786(0.636–0.971) |
| CTGF     | <0.001 | 0.836(0.771–0.908) |
| SUMO1    | 0.004  | 0.656(0.492–0.875) |
| MTOR     | 0.015  | 1.246(1.043–1.487) |
| DLL3     | 0.027  | 1.258(1.027–1.540) |
| DBN1     | 0.002  | 1.304(1.104–1.541) |
| ATR      | 0.002  | 1.524(1.166–1.993) |
| UCP2     | 0.001  | 1.329(1.117–1.580) |
| GCLC     | <0.001 | 1.530(1.234–1.898) |
| GCLM     | 0.004  | 0.760(0.632–0.914) |
| SIRT6    | <0.001 | 1.563(1.214–2.012) |
| CSNK1E   | 0.001  | 1.267(1.100–1.460) |
| STUB1    | 0.046  | 1.506(1.006–2.255) |
| CHEK2    | 0.025  | 1.279(1.032–1.585) |
| ARHGAP1  | 0.007  | 1.365(1.087–1.713) |
| CDC42    | 0.001  | 0.625(0.469–0.835) |
| ARNTL    | <0.001 | 0.757(0.647–0.886) |
| CLOCK    | <0.001 | 2.348(1.658–3.325) |
| PPARGC1A | 0.031  | 1.172(1.014–1.354) |
| GPX4     | 0.043  | 0.741(0.555–0.990) |
| EFEMP1   | 0.021  | 0.822(0.697–0.971) |
| ERCC4    | 0.003  | 1.346(1.106–1.638) |
| SIRT7    | 0.006  | 1.436(1.108–1.862) |
| SIRT3    | 0.011  | 1.344(1.069–1.689) |
| NCOR2    | 0.019  | 1.319(1.047–1.663) |
| BAK1     | <0.001 | 1.862(1.434–2.418) |
| IGFBP2   | <0.001 | 0.863(0.797–0.934) |
| PYCR1    | 0.004  | 1.293(1.084–1.541) |
| TP73     | <0.001 | 1.278(1.125–1.453) |
| NFE2L2   | <0.001 | 0.699(0.579–0.844) |
| PDGFRA   | 0.016  | 0.805(0.675–0.960) |
| C1QA     | <0.001 | 1.219(1.123–1.324) |
| CDKN2B   | <0.001 | 0.698(0.592–0.823) |
| EIF5A2   | 0.002  | 0.807(0.704–0.924) |
| MT1E     | 0.046  | 1.122(1.002–1.257) |
| GSK3A    | <0.001 | 1.419(1.186–1.697) |
| GRN      | 0.028  | 1.234(1.023–1.489) |
| SPRTN    | 0.002  | 0.708(0.568–0.883) |
| CTF1     | <0.001 | 1.244(1.100–1.408) |
| NFE2L1   | 0.014  | 1.419(1.074–1.874) |
| IFNB1    | 0.016  | 1.180(1.031–1.350) |
| GDF11    | 0.005  | 1.391(1.107–1.749) |

0.0 1.0 2.0 3.0

Hazard ratio
